# Supplementary material for: Context-specific synthetic T cell promoters from assembled transcriptional elements
Source: Research Square preprint supplement (doi:10.21203/rs.3.rs-3339290/v1), 2023-10-17
Supplement: Supplementary file 1 [file 170820ba04a9123f1b776b8a.xlsx]

## Sheet: Cytotoxicity 
Donor A CD4														Donor B CD4														Donor C CD4+
Hours	Mock			CAR Alone			S1-61_PD1(A99L):MyD88			S1-61_TurboGFP				Hours	Mock			CAR Alone			S1-61_PD1(A99L):MyD88			S1-61_TurboGFP				Hours	Mock			CAR Alone			S1-61_PD1(A99L):MyD88			S1-61_TurboGFP
20	2071209	2218709	2504679	986229	591612	792615	1602629	1907675	2214481	3380707	2357642	1903892		20	2195711	2259086	2959722	2581022	1586777	1506184	807089	1106886	512608	1044343	1585343	832750		20	1158838	1663853	1983919	527134	193081	112030	298495	203131	160031	253158	106517	206073
24	1364019	1550444	1559937	736044	397388	426809	1055122	1163415	1352226	2576347	1637174	1059591		24	1497321	1579790	1864823	1635229	887336	721558	554086	686596	289695	602079	938719	472516		24	803709	1156916	1400369	249250	74289.8	38389.1	163302	76574.5	51799.8	190954	90018.9	154867
28	1277485	1568103	1676678	662269	380778	270187	962426	976936	1248675	2536368	1673521	979628		28	1461292	1644493	1928306	1683647	656696	614033	508077	592888	247770	600153	863549	383248		28	797184	1134648	1415405	153804	47983.9	19803.9	149240	82796.9	33114.9	170181	49959	133293
32	1298865	1518916	1726831	625792	347143	241494	794616	931436	1199922	2861884	1644706	848309		32	1423502	1650531	1994219	1714428	519675	499420	485792	507754	248609	508407	784796	315465		32	876167	1153999	1453562	202116	36721	11763.9	114956	65248	28422.5	181303	44418.7	127571
36	1377275	1548671	1948202	567437	313266	221117	685814	790324	1205528	2895283	1774045	739981		36	1587747	1855364	2157950	1701388	444257	383647	491646	434215	208768	471603	790371	255018		36	979793	1238870	1603508	182904	29034.6	11276	84439.2	59488.8	36897.1	168722	45641.8	107527
40	1511142	1517150	2104096	541924	291869	158387	581613	762137	1188547	3032169	1855911	675042		40	1660289	2037399	2333759	1610167	346964	336124	472831	414115	245150	492509	757167	191002		40	1095463	1333498	1696388	183871	17869.2	10840	47708	61141.7	24854.4	169185	58230	70330.2
44	1568497	1639434	2387739	551215	281561	112774	495243	690620	1217695	2958454	1878021	582470		44	1652888	2181579	2631088	1592767	317225	259305	460151	415258	190545	455495	686543	152182		44	1190656	1496032	2040193	139696	17968.2	10237.8	51976.9	48520.4	22808	142637	53322.3	71828.1
48	1766505	1881944	2534282	505733	253336	97012	512062	651419	1177095	2880225	1827477	519662		48	1885019	2376002	2975824	1556045	309800	243640	462156	320943	153722	426885	623216	106352		48	1263828	1534831	2108435	159993	16804.3	9969.9	46248.6	49826.5	23512.8	150160	60120.4	62417.5
52	1874786	2096118	2817826	488774	253671	82019.8	439950	579451	1113276	3010166	1942280	378418		52	2044826	2624187	3286285	1684147	289638	109126	485927	318902	151401	502015	656247	115941		52	1536206	1636418	2246746	175683	9209.95	9506.86	40878.7	28544.8	22889.9	136181	60402.1	56074.6
56	2222542	2375944	3041968	437439	222924	26140	292476	530309	1110490	3385674	1851115	335750		56	2202437	2948186	3564270	1613197	286936	106044	497890	256821	168750	433768	556987	103004		56	1725999	1809470	2417513	266630	7471.86	6411.96	41290.8	30091	21219.9	151762	59846.6	56854.6
60	2520530	2816255	3516219	417296	203980	17923.2	256493	504768	1032167	3360795	1733469	273705		60	2376473	3222120	3850875	1615416	259863	65921	504678	261741	169553	324322	513036	105963		60	1955596	1953484	2978781	298906	6637.26	7459.31	39311.1	31529.2	18956	148108	52258.2	56093.4
64	2600651	3144991	3717056	316057	214297	13838	190374	401974	1010042	3481628	1423860	259891		64	2647750	3564499	4080495	1744152	244912	36948.4	548738	266103	199941	319761	428510	99986.9		64	2079103	2181987	3693030	332740	6329.79	4950.08	33268.7	32979.5	17422.7	144371	52118.3	62071
68	417469	1432556	6491844	63660.9	158757	843.17	3034.16	143340	22936.2	683855	1318854	34568.9		68	98889.1	53614.4	1996073	122353	138566	77724.5	133048	237332	0	164002	254662	357988		68	256315	187918	1546.77	129013	103746	130327	2779911	2777266	21702.5	3746666	3214129	2806495
72	5757669	6063162	7236826	1947435	2092147	1708889	1260168	1899458	2943351	5979573	3855245	1575841		72	5664471	6143160	8813897	2964981	2591159	1349526	1824808	2017560	1384908	1844184	2620641	1649099		72	5932911	4952723	7517780	2437237	1560427	1656667	2143223	2133692	1724265	3262411	2764859	2487567
76	6399476	6652907	8219640	1887022	2179617	1780413	1297101	2021793	2859075	6631225	3983553	1466991		76	6270073	6559891	9962405	3259301	2273708	1340371	1894510	2170008	1334281	1871220	2751855	1750591		76	6695627	5467915	8228756	2631002	1564217	1584973	2110014	1983053	1669134	3540009	2723703	2706721
80	7182526	7444074	9301771	2107780	2366362	2105881	1364241	2230151	3141333	7626077	4262104	1571378		80	6725549	7833830	10700000	3167657	2701799	1702576	2109490	2259487	1720877	2043300	3023442	1916632		80	7156976	6112561	9257517	2700510	1771433	1782142	2041011	1999625	1806070	3799721	3016353	3065917
84	8216948	8455423	10400000	2261501	2606323	2114446	1435598	2499825	3185866	8498964	4580695	1629728		84	7630506	8710985	12700000	3393707	2852652	1835177	2267897	2397757	1908467	2082485	3324926	1890262		84	8226744	7241909	10700000	3098809	1956959	1945943	2131497	1928008	1974172	4202531	3315241	3428039
88	9684510	10000000	11900000	2564218	2756990	2361438	1626189	2584303	3473289	9367010	5101879	1796392		88	9207255	10400000	14500000	3513084	3347082	1980036	2227227	2297479	2226363	2213400	3589391	2072400		88	10100000	8485488	12700000	3360091	2103993	2148593	2354426	1896869	2053846	4863090	3727820	3877283
92	11000000	11600000	13500000	2768545	2829760	2567381	1686856	2588008	3719514	9812303	5634411	1888274		92	10400000	11800000	16500000	3363853	3425029	2056240	2193001	2266747	2481015	2376742	3968425	2359612		92	11300000	9406713	13500000	3950367	2399252	2268359	2419861	2106538	2208401	5566693	4140798	4280487
96	12300000	12700000	15000000	3063489	3069106	2614920	1622697	2721243	3725633	10800000	6356205	2092105		96	12000000	13500000	17400000	3439961	3668565	2119233	2198468	2109498	2450937	2557450	4377870	2448184		96	12500000	11300000	14800000	4525456	2853203	2534935	2621244	2162365	2199744	6134752	4643849	4812743
100	14200000	14500000	15400000	3054195	3402218	3080281	1749586	2826295	3647132	11900000	6882675	2132759		100	13500000	14400000	19100000	3365005	3940856	2149055	2136352	1967331	2513487	2847757	4736338	2509765		100	14500000	12500000	15900000	5229254	3247719	2751276	2780542	2182118	2138006	6837888	5001549	5459195
104	13700000	15300000	18100000	3148799	3842974	3524331	1903868	2869177	3842005	13000000	7214551	2338440		104	14500000	16900000	20600000	3340705	4188806	2347813	2304944	1868322	2636876	3208920	5344065	2591279		104	15300000	13000000	17800000	5765715	3632941	2926168	2642175	2526014	2158237	7680458	5453292	6245685
108	15800000	17200000	18300000	3495363	3981783	3787776	1914091	2734196	3785911	13700000	7657427	2485858		108	16800000	17400000	23000000	3351608	4289568	2278466	2310134	1753999	2839146	3483156	5449139	2742620		108	17100000	15200000	17800000	6446563	4105349	3492269	2708546	2605120	2180421	8549287	5959268	7030115
116	25400000	27000000	26800000	5326087	6909853	5388567	2760484	3764561	5410238	20200000	11300000	4291027		116	23600000	26000000	32100000	4329620	5304101	3505431	1482807	1505923	3969866	4921910	7715628	3518961		116	25600000	23200000	27600000	11100000	7982963	6207809	3324381	3389943	3016128	11900000	8216639	10400000
120	27900000	28300000	31100000	5765164	6724675	5549935	2572511	3778493	5228153	20900000	11700000	4517119		120	26500000	29200000	34900000	4395891	5222236	3642537	1153459	1328809	3827853	4936386	8069637	3319175		120	27900000	25400000	30800000	12400000	9072285	7007246	3096500	3478859	3024988	13200000	9388667	11200000
124	29000000	31900000	32400000	6029091	6916613	5803726	2277751	3745166	5513400	20700000	12100000	4676008		124	27900000	31800000	36900000	4692505	5182936	3853922	965487	1415531	3438451	4850591	8517605	3287122		124	28700000	25200000	30800000	13800000	10500000	7901468	2814492	3544305	3043431	14300000	10300000	12700000
128	31000000	33400000	35200000	6477928	7285356	6170804	1929009	3919813	5427453	20500000	13200000	4961217		128	31000000	31500000	37800000	4921201	5543579	4203372	734132	1174700	2925207	5021057	9041406	3271965		128	30400000	26700000	31700000	15900000	11700000	8968262	2539958	3588944	2930375	15900000	11200000	13800000
132	32800000	33700000	37900000	6677264	7687240	6454213	1412853	3325850	5214938	19800000	13500000	5311958		132	31900000	35100000	39200000	5130204	5756406	4497972	391558	1089864	2390143	5254841	9111001	3081706		132	31400000	30100000	33600000	17400000	13000000	10200000	2331089	3675127	3045746	17300000	12000000	15400000
136	33400000	34600000	40000000	7209306	8039199	6788079	1108680	3083424	5292290	19400000	14400000	5601085		136	33500000	37200000	39600000	5762423	6257198	4629327	232671	911285	1498194	5411672	9392498	2862514		136	32700000	32100000	34000000	18900000	15100000	11700000	2217593	3751842	3030146	19000000	13000000	16600000
140	47900000	48400000	55500000	13700000	15100000	12600000	4131307	6941534	9751912	13700000	10800000	6058456		140	47000000	51900000	57300000	10700000	12900000	7429457	1709407	2424726	5186733	4658511	9885328	3287594		140	44000000	45600000	49900000	32200000	25000000	21700000	3026564	1295336	8917351	23600000	17800000	19700000
144	42800000	44400000	50900000	11800000	13000000	10900000	2768266	5083701	7054353	18900000	17100000	8806863		144	42300000	47400000	57800000	8939398	10800000	6330767	3216301	3383985	3773029	7281660	13400000	4829461		144	40400000	40700000	45200000	27900000	22200000	18100000	6158265	7075696	6574142	23700000	18200000	20300000
148	43600000	45000000	51100000	12200000	13900000	11800000	2851250	5549399	6873929	20100000	18100000	9529174		148	42200000	48200000	57000000	9247308	11400000	7087458	3308443	3064309	3514193	7403695	13700000	4962318		148	42000000	40200000	45100000	30200000	23900000	19900000	6491798	7508770	6869196	26300000	19300000	21900000
152	44000000	44900000	50600000	13200000	15500000	13000000	3132920	5410181	6558658	21900000	19400000	10300000		152	43000000	49500000	58200000	9623091	12300000	8064146	3029303	2861321	3619452	7904762	14400000	5211822		152	40700000	41000000	44900000	33200000	26900000	21700000	6403761	8049925	6612037	28300000	19100000	24100000
156	44800000	46700000	49700000	14000000	16900000	13800000	3456980	5326710	6653454	23900000	20800000	11200000		156	43500000	47900000	56300000	10400000	13200000	8819238	3225282	2608033	3200373	8104235	15200000	4844869		156	40300000	40200000	42500000	35600000	29800000	23700000	6539881	8142707	6696871	30300000	19900000	26500000
160	43500000	43200000	47500000	15400000	17500000	15000000	3504929	4701558	5856018	25600000	21400000	12200000		160	42700000	46600000	51800000	11100000	14200000	9804582	3067426	2021819	2962050	9092540	16200000	5439870		160	38700000	38400000	41400000	38700000	32900000	26200000	6597799	8608067	7091821	33000000	19900000	28700000
164	40900000	40700000	46600000	16400000	18900000	16100000	3563800	3316921	5386675	28000000	22900000	12900000		164	38900000	45100000	52300000	11800000	14800000	10800000	3252396	1669526	2266854	9555158	16800000	5729918		164	38200000	38200000	40000000	41800000	36500000	29200000	6541188	8630214	7221229	35400000	19200000	31700000
168	39300000	39700000	46300000	18100000	20300000	16800000	3594247	2506610	5152781	30200000	24500000	13300000		168	39100000	43400000	52000000	13100000	16000000	11600000	2317304	1182020	1392206	10300000	17800000	5884079		168	36900000	36100000	38500000	45000000	37600000	32400000	6560149	8999202	7240592	37800000	19400000	33400000
172	38100000	39800000	45700000	19400000	22100000	18000000	3641035	1354762	4803598	31800000	26700000	14100000		172	39200000	41100000	52500000	14300000	17200000	12200000	2386083	791950	970331	11000000	18700000	6114596		172	35400000	37400000	38900000	47200000	41100000	35600000	6373203	8722283	7205452	40300000	17900000	36700000
176	38800000	40400000	43800000	20600000	23100000	19500000	3209161	974460	4392287	34300000	28200000	15300000		176	38100000	43600000	53600000	15500000	18300000	13000000	1407866	741226	470801	11800000	19300000	6066578		176	34800000	34900000	38400000	49900000	43000000	37900000	6172146	8505568	7266576	43400000	16300000	38700000
180	38900000	39400000	43900000	21600000	25100000	20100000	2883168	679425	3717831	35500000	29800000	15600000		180	38500000	42000000	53800000	16600000	19700000	14100000	826819	408866	373295	12700000	20600000	5984876		180	34200000	34700000	37800000	52400000	45400000	41000000	6008527	8006933	6804557	45700000	15500000	42500000
184	37100000	37600000	43300000	22800000	27800000	21500000	2487617	396874	2968062	37200000	30100000	16600000		184	37100000	43400000	54700000	18100000	21100000	15000000	479618	323717	280549	13400000	21500000	6086831		184	34400000	35400000	38000000	55000000	48600000	42500000	5623475	7644378	6705825	48700000	14400000	44900000
188	38300000	42100000	43400000	24600000	30100000	23000000	2193952	271930	1915731	37800000	29900000	18100000		188	37700000	43500000	56700000	20100000	23100000	16300000	338913	197747	247010	13800000	22500000	6020001		188	34200000	36100000	38600000	59300000	49600000	44100000	5494595	7748347	6702730	52100000	14500000	48000000
192	37900000	38600000	43200000	26800000	32700000	25400000	1842452	243952	1583470	37400000	29200000	18600000		192	36500000	41600000	52400000	22300000	24700000	17300000	232942	109439	175970	15300000	23100000	6465720		192	33300000	34400000	38100000	60200000	54100000	47100000	5389660	7534456	6983605	53900000	13600000	50100000
196	36500000	38000000	41400000	27900000	34500000	27200000	1590555	172188	1191889	36000000	28900000	19400000		196	36500000	40700000	52800000	24200000	25300000	18900000	200106	92596.2	96744.2	16100000	23500000	6268532		196	32500000	33100000	37000000	63700000	53600000	50100000	4740914	7667043	6810511	58800000	13100000	52600000
200	35200000	36700000	40600000	29300000	35500000	28000000	1150914	143780	953700	35400000	27700000	20200000		200	35900000	40300000	50600000	26200000	27400000	20600000	193497	75478.3	96366.1	16800000	23600000	6629913		200	32600000	32800000	35300000	66100000	54200000	50500000	4460838	7674538	6620448	60200000	13200000	54900000
204	34300000	35900000	40900000	30100000	38100000	29000000	932050	142584	594096	34300000	26300000	21500000		204	34000000	38200000	48700000	28500000	30600000	21700000	154777	84973.4	80760.1	17700000	24500000	6656059		204	31800000	31000000	35200000	66400000	56000000	52500000	4205069	7372460	6198619	62100000	12600000	56100000
208	34100000	34300000	38400000	30400000	38700000	28700000	829133	125898	477192	34200000	25600000	22300000		208	33400000	36600000	45800000	31300000	32700000	23300000	137864	86292.2	48627.9	18900000	25500000	7522051		208	31100000	30700000	33300000	68100000	54900000	53700000	3823811	7250305	6098380	63500000	12100000	59500000
212	32700000	32700000	38300000	30300000	38100000	28900000	702222	100002	281017	33700000	24400000	23300000		212	31800000	35600000	45100000	32400000	34100000	25000000	127406	84614.6	68173.2	20200000	25300000	8079712		212	30600000	29800000	32300000	64100000	54700000	49200000	3676813	7035501	5921348	64200000	12800000	60000000
216	31800000	32400000	36300000	29700000	37500000	28400000	458358	82491.6	222128	33200000	23600000	24400000		216	30200000	34100000	42700000	32200000	37600000	26000000	132296	58702	75323.9	20900000	25500000	7976933		216	29500000	29000000	32000000	64900000	52600000	50100000	3233077	6602732	5945503	63300000	12300000	59600000
Donor A CD8														Donor B CD8														Donor C CD8
Hours	Mock			CAR Alone			S1-61_PD1(A99L):MyD88			S1-61_TurboGFP				Hours	Mock			CAR Alone			S1-61_PD1(A99L):MyD88			S1-61_TurboGFP				Hours	Mock			CAR Alone			S1-61_PD1(A99L):MyD88			S1-61_TurboGFP
20	1703456	2046427	2325110	184294	219686	144147	127649	183651	61824.3	159619	119636	142882		20	1983919	527134	193081	112030	298495	203131	160031	952187	597384	206073	106517	206073		20	3072044	3022291	2349383	362205	364714	75604.7	172055		250516	521096	383753	267879
24	1181815	1330292	1462088	108651	108464	45730.6	76824.2	93409.4	18880.7	62029.2	60863.3	58676		24	1400369	249250	74289.8	38389.1	163302	76574.5	51799.8	600973	376462	154867	90018.9	154867		24	2480732	2467613	1836569	275371	250848	16662.9	99109.7		158960	327556	278358	146291
28	1263825	1327269	1483739	91987.5	53712.4	19661	69207.7	86777.4	16540.7	60583.8	29836.1	56415.8		28	1415405	153804	47983.9	19803.9	149240	82796.9	33114.9	592745	338717	133293	49959	133293		28	2702998	2581963	2056560	231042	248080	7346.09	86593.7		162450	305701	279079	125026
32	1247412	1293413	1611337	77286.4	23720.1	18709.4	46819.9	71985	21942.2	54396.9	22574.5	62778.6		32	1453562	202116	36721	11763.9	114956	65248	28422.5	689290	326542	127571	44418.7	127571		32	2823224	2856956	2053473	254007	245166	6831.93	59356.6		141255	320413	276685	92808.3
36	1358652	1310169	1782638	72129.3	19817.5	14861.3	39955.9	67301.1	15662.8	59471.4	14927.6	46689.1		36	1603508	182904	29034.6	11276	84439.2	59488.8	36897.1	730726	279330	107527	45641.8	107527		36	3125998	3101357	2241921	259241	271342	5250.13	69632.5		107977	328264	280660	76929.7
40	1431714	1472463	1927234	18426.8	18966.3	12207.5	32724.4	79490.5	7569.4	45535.9	19282.6	39427.6		40	1696388	183871	17869.2	10840	47708	61141.7	24854.4	762092	246704	70330.2	58230	70330.2		40	3438688	3590107	2603816	272560	243798	4883.28	58380.2		91930	342228	275740	47121.4
44	1539717	1630380	2099933	40864.8	10489.2	11616.2	33359.5	64904.7	12849.6	34471.4	19536.5	59670		44	2040193	139696	17968.2	10237.8	51976.9	48520.4	22808	766853	214459	71828.1	53322.3	71828.1		44	3589498	3899719	2907950	277123	252983	4500.11	34245.2		82316.9	302199	282755	46251.8
48	1726924	1648611	2177960	16366.1	10176.6	11654.8	34598.2	57416.1	12837.5	9052.5	19510.4	62637.5		48	2108435	159993	16804.3	9969.9	46248.6	49826.5	23512.8	915594	209169	62417.5	60120.4	62417.5		48	3814193	4103356	3106917	323038	280179	4243.97	44147.3		79867.6	320770	287149	45338.2
52	1852210	1835374	2398274	19608.7	8104.37	11885	36177.1	30584	10282.5	7616.55	19571	58740.5		52	2246746	175683	9209.95	9506.86	40878.7	28544.8	22889.9	948415	187899	56074.6	60402.1	56074.6		52	4336689	4582318	3510519	312258	276642	4091.96	32607.5		54211.7	304455	332196	44890.1
56	1888681	1860307	2761952	8485.75	6285.77	11308.7	41180.8	31918.2	11906.3	7042.9	16954.6	71641		56	2417513	266630	7471.86	6411.96	41290.8	30091	21219.9	1109145	215026	56854.6	59846.6	56854.6		56	4881268	5067109	4026906	304450	208042	4607.27	30502.8		32920.4	310525	338870	43812
60	2060459	2020290	3040522	8197	6245.21	10144	38323.4	34177.4	11324.7	6779.86	15986.6	31510.1		60	2978781	298906	6637.26	7459.31	39311.1	31529.2	18956	1093620	169536	56093.4	52258.2	56093.4		60	5238098	5706445	4607487	303125	158534	7124.45	19123.4		32105.3	332232	366523	48686.3
64	2250703	2231054	3312950	6819.69	5858.6	9899.96	41243.4	34439.3	10992.5	6227.02	15375.3	30922		64	3693030	332740	6329.79	4950.08	33268.7	32979.5	17422.7	1227672	186086	62071	52118.3	62071		64	6036836	6571025	5200198	289878	142572	6369.73	21123.6		30770.8	315787	351330	49981.4
68	24668.9	218483	222648	61.7872	236599	3117.59	307697	22951.3	158192	2137059	1730011	1360108		68	1546.77	129013	103746	130327	2779911	2777266	21702.5	4024864	3242325	2806495	3214129	2806495		68	9772008	11500000	9531359	3575907	3301285	2824700	2526134		2784477	2223930	2095094	2592739
72	4219631	5410984	6713171	2283549	2578118	2163387	2110852	1840209	1843913	1644040	1385514	1114216		72	7517780	2437237	1560427	1656667	2143223	2133692	1724265	3496983	2737538	2487567	2764859	2487567		72	10000000	11500000	9291462	3053985	2858627	2476631	2100277		2133129	1887455	1559194	2239883
76	4864398	6188552	8032201	2431476	2571046	2065166	1938042	1812176	1791402	1703458	1322006	1228764		76	8228756	2631002	1564217	1584973	2110014	1983053	1669134	3613282	2683159	2706721	2723703	2706721		76	11000000	12800000	10100000	2851375	2762873	2467049	2131306		1815366	1921803	1456349	2114802
80	5710056	7168017	8615458	2624013	2479906	2093950	1923841	1932727	1728705	1816657	1510163	1372131		80	9257517	2700510	1771433	1782142	2041011	1999625	1806070	4134145	2845873	3065917	3016353	3065917		80	12300000	14600000	10900000	3006719	2783714	2666358	1983263		1688162	2150112	1491206	2187436
84	6313081	8058863	10100000	2804876	2744707	2141124	2291484	2128151	1761071	2103749	1594614	1600775		84	10700000	3098809	1956959	1945943	2131497	1928008	1974172	4556932	3138527	3428039	3315241	3428039		84	13700000	15800000	11900000	3245230	3108676	2688424	2022661		1611473	2178251	1543825	2214361
88	7908600	9253508	10900000	3294810	2801434	2173111	2465133	2275992	1913785	2437140	1794128	1728185		88	12700000	3360091	2103993	2148593	2354426	1896869	2053846	5042558	3292807	3877283	3727820	3877283		88	15600000	17500000	13300000	3692798	3251491	2765224	2117897		1562509	2308969	1562603	2299404
92	8819678	11500000	13000000	3531900	3091180	2394772	2641701	2435377	1815024	2719345	1890038	1763684		92	13500000	3950367	2399252	2268359	2419861	2106538	2208401	5868119	3579871	4280487	4140798	4280487		92	17500000	19500000	14700000	4009030	3374234	3111723	2292810		1574223	2478057	1509254	2405001
96	10800000	12500000	14500000	3781195	3264169	2448412	2822939	2639021	1927380	3007815	2181875	1886916		96	14800000	4525456	2853203	2534935	2621244	2162365	2199744	6539166	4063392	4812743	4643849	4812743		96	19000000	21000000	16400000	4153484	3613482	3354132	2252694		1666669	2567388	1673469	2486306
100	12400000	14100000	15900000	3887550	3663690	2523174	2872590	2748955	1880924	3244358	2259064	2058827		100	15900000	5229254	3247719	2751276	2780542	2182118	2138006	7190230	4373010	5459195	5001549	5459195		100	20300000	22600000	18400000	4334760	3858900	3461420	2339397		1609491	2701945	1857727	2688639
104	12600000	15400000	16400000	3937646	3565879	2834162	2777716	2916022	1910870	3444771	2372874	2105721		104	17800000	5765715	3632941	2926168	2642175	2526014	2158237	8071497	4795512	6245685	5453292	6245685		104	22000000	22800000	19500000	4523448	3916856	3666242	2214312		1604728	2802242	1958991	2678052
108	14800000	15600000	18300000	4156699	3640966	3070152	2878934	2954027	1694092	3749841	2712798	2285732		108	17800000	6446563	4105349	3492269	2708546	2605120	2180421	8846012	5179963	7030115	5959268	7030115		108	22800000	25300000	20900000	4586269	4121045	3658513	2427083		1427884	2834994	2197814	2788853
116	23000000	24500000	27300000	6186546	5536330	4016068	3624682	3704603	1754996	5567810	4433507	3718243		116	27600000	11100000	7982963	6207809	3324381	3389943	3016128	12900000	7341419	10400000	8216639	10400000		116	26400000	31100000	26700000	5586518	4684958	4716717	2891375		1772600	3412483	2852226	3339056
120	25400000	28000000	28200000	6458776	5780201	4234822	3615773	3536066	1542283	5745898	4674714	4058449		120	30800000	12400000	9072285	7007246	3096500	3478859	3024988	14000000	7697373	11200000	9388667	11200000		120	30200000	34500000	29800000	6019687	4908570	4831853	3144785		1680086	3380156	2945089	3822739
124	26400000	29000000	32000000	6877982	6002696	4196548	3705527	3429459	1039248	5904971	5014765	4399008		124	30800000	13800000	10500000	7901468	2814492	3544305	3043431	15100000	7907881	12700000	10300000	12700000		124	31200000	34700000	30200000	6208677	5142970	4808754	3018274		1723840	3595676	2927277	3990108
128	28400000	30400000	33400000	7258144	5853398	4127171	3755581	3395275	819801	6243843	5441129	4490476		128	31700000	15900000	11700000	8968262	2539958	3588944	2930375	16500000	8150323	13800000	11200000	13800000		128	32000000	35200000	33600000	6794515	5387382	5104072	3069920		1693702	3721492	3127143	4193934
132	28400000	32300000	35100000	7843675	5971873	3993741	3715042	3326653	579999	6720261	5748057	4724978		132	33600000	17400000	13000000	10200000	2331089	3675127	3045746	17200000	8679859	15400000	12000000	15400000		132	32200000	37500000	35400000	7395910	5592855	5590127	3153607		1681241	3791816	3398381	4232450
136	29400000	33200000	36500000	7790874	6248828	4126517	3692814	3260965	526334	7213514	6198729	5266359		136	34000000	18900000	15100000	11700000	2217593	3751842	3030146	18300000	8999452	16600000	13000000	16600000		136	32200000	38700000	36200000	7718425	5758045	5776766	3351653		1738109	3948811	3719912	4465359
140	41900000	46100000	49400000	15600000	11800000	11500000	8698905	9548028	6579925	13000000	11800000	10200000		140	49900000	32200000	25000000	21700000	3026564	1295336	8917351	14800000	6897256	19700000	17800000	19700000		140	39700000	48200000	46600000	11200000	9264374	9196121	5560243		3811739	5630431	6580366	7024880
144	39400000	42500000	46200000	12100000	9196281	8560241	6503584	6659039	4397681	11500000	10300000	8727046		144	45200000	27900000	22200000	18100000	6158265	7075696	6574142	23800000	13100000	20300000	18200000	20300000		144	44700000	52600000	47900000	10700000	8640558	8527898	5283072		3417738	5306271	6815993	6475163
148	37900000	42500000	44800000	12900000	10000000	8930329	6793751	6880917	4501002	12200000	10300000	9417458		148	45100000	30200000	23900000	19900000	6491798	7508770	6869196	25200000	13900000	21900000	19300000	21900000		148	43200000	52600000	48700000	10600000	9103829	8482358	5186073		3274996	5700311	7084294	6871356
152	39200000	43700000	47200000	13400000	10900000	9534224	6972526	6949209	4071301	13300000	10800000	10100000		152	44900000	33200000	26900000	21700000	6403761	8049925	6612037	27300000	14400000	24100000	19100000	24100000		152	43300000	50200000	49200000	11200000	9218013	8873087	5400839		3300953	5622945	7317415	6845409
156	38900000	42800000	44200000	13800000	11900000	10300000	6996744	7319165	4619408	14100000	11700000	11200000		156	42500000	35600000	29800000	23700000	6539881	8142707	6696871	28800000	15500000	26500000	19900000	26500000		156	42500000	49200000	50200000	11400000	9466957	9475733	5683458		3331378	5876918	7841381	7046352
160	36900000	41100000	42200000	14600000	13100000	11200000	7221541	7201161	4801907	14800000	12400000	12100000		160	41400000	38700000	32900000	26200000	6597799	8608067	7091821	30800000	16300000	28700000	19900000	28700000		160	38500000	46500000	48900000	11500000	9809208	9999584	5363056		3175384	5997091	8723650	7311229
164	36100000	40100000	41200000	15300000	14000000	12100000	7297920	7285315	4746632	14700000	13300000	13200000		164	40000000	41800000	36500000	29200000	6541188	8630214	7221229	32800000	17800000	31700000	19200000	31700000		164	40500000	46100000	48400000	12000000	10700000	10600000	5595024		3238998	6140544	8882476	7819916
168	34600000	40000000	41900000	16100000	14200000	12800000	7481422	7321312	4467306	15400000	14000000	14200000		168	38500000	45000000	37600000	32400000	6560149	8999202	7240592	35200000	18500000	33400000	19400000	33400000		168	39100000	47100000	46100000	12500000	11200000	11000000	5516192		3185481	6383182	9246004	8400894
172	34300000	40000000	40200000	16600000	15100000	13800000	7945823	7183817	4369518	16200000	14900000	15500000		172	38900000	47200000	41100000	35600000	6373203	8722283	7205452	37700000	18900000	36700000	17900000	36700000		172	40600000	47700000	43900000	12900000	11900000	11700000	5741204		3100178	6685324	9651860	9146212
176	32900000	38800000	39600000	17400000	15400000	15200000	7805577	7041037	3727276	17600000	16100000	15700000		176	38400000	49900000	43000000	37900000	6172146	8505568	7266576	38000000	19900000	38700000	16300000	38700000		176	39200000	47300000	46500000	13100000	12300000	12200000	5222216		3120794	6790937	10300000	9616054
180	34000000	40100000	40600000	18500000	15800000	15800000	7517023	7242015	3412054	18600000	17300000	16700000		180	37800000	52400000	45400000	41000000	6008527	8006933	6804557	40500000	21400000	42500000	15500000	42500000		180	40600000	46800000	45600000	14000000	12300000	13100000	5177005		2974814	7023510	11000000	10100000
184	33800000	40100000	40800000	19200000	17400000	16200000	7317461	6880479	2901319	19200000	18600000	17800000		184	38000000	55000000	48600000	42500000	5623475	7644378	6705825	41100000	22200000	44900000	14400000	44900000		184	41000000	47100000	47200000	14300000	12300000	13400000	5684437		2670946	7100354	11800000	10500000
188	33300000	39900000	39900000	20400000	17600000	17000000	7513376	6307157	2525467	20200000	19700000	19100000		188	38600000	59300000	49600000	44100000	5494595	7748347	6702730	42400000	23400000	48000000	14500000	48000000		188	40800000	46300000	46500000	14200000	13000000	13900000	5404817		2477243	7149834	12500000	10700000
192	33200000	39100000	38200000	21400000	19400000	18200000	7506700	6035581	2156083	20900000	20300000	20300000		192	38100000	60200000	54100000	47100000	5389660	7534456	6983605	41900000	23600000	50100000	13600000	50100000		192	40600000	45700000	45900000	15100000	13600000	14500000	5415143		2362174	7405973	13400000	11000000
196	33100000	38600000	38800000	22300000	20100000	19200000	7151111	5468397	2007253	21900000	21200000	21500000		196	37000000	63700000	53600000	50100000	4740914	7667043	6810511	41400000	23500000	52600000	13100000	52600000		196	39100000	43800000	44700000	16000000	13400000	14900000	5427065		2347744	7631157	14100000	11900000
200	32700000	37800000	38600000	23500000	20900000	20000000	7014688	5057981	1386534	23000000	23100000	23100000		200	35300000	66100000	54200000	50500000	4460838	7674538	6620448	39800000	23500000	54900000	13200000	54900000		200	38500000	42900000	43900000	16100000	13600000	15200000	5274436		2324585	7918656	14300000	12400000
204	31100000	37100000	36800000	25100000	22200000	21600000	7159113	4786576	1095802	23300000	24200000	24000000		204	35200000	66400000	56000000	52500000	4205069	7372460	6198619	39200000	22900000	56100000	12600000	56100000		204	37300000	41800000	43700000	16800000	14200000	15500000	5129226		2104039	8476787	15000000	13000000
208	31000000	36400000	36300000	25800000	23400000	22600000	6871231	4407240	994336	24600000	25200000	24800000		208	33300000	68100000	54900000	53700000	3823811	7250305	6098380	37900000	22900000	59500000	12100000	59500000		208	36300000	40100000	42800000	17400000	15300000	16100000	4876412		2137252	8679357	15700000	13500000
212	28800000	35800000	35800000	27200000	24800000	23900000	6414197	4090408	719344	25000000	26700000	25200000		212	32300000	64100000	54700000	49200000	3676813	7035501	5921348	37300000	22300000	60000000	12800000	60000000		212	35900000	39400000	41300000	17700000	15900000	17000000	4411892		1868320	9268644	16100000	14100000
216	29100000	33600000	33800000	28000000	26000000	25700000	6338786	3781156	590863	25600000	27000000	25400000		216	32000000	64900000	52600000	50100000	3233077	6602732	5945503	35800000	21500000	59600000	12300000	59600000		216	34800000	38400000	40400000	18500000	16500000	17500000	3866507		1825609	9808681	16900000	14600000

## Sheet: Proliferation
Donor A CD4														Donor B CD4														Donor C CD4
Hours	Mock			CAR Alone			S1-61_PD1(A99L):MyD88			S1-61_TurboGFP				Hours	Mock			CAR Alone			S1-61_PD1(A99L):MyD88			S1-61_TurboGFP				Hours	Mock			CAR Alone			S1-61_PD1(A99L):MyD88			S1-61_TurboGFP
20	257	591	128	849	720	682	720	849	617	77	553	682		20	630	193	2161	347	1248	707	990	630	694	488	386	1055		20	424	965	849	514	488	823	1235	1068	849	759	1132	669
24	102	128	115	579	579	488	617	476	283	77	437	553		24	540	102	1351	244	772	591	398	424	591	437	218	682		24	334	784	669	270	424	501	952	836	579	527	900	450
28	167	167	154	617	463	617	540	424	360	90	347	604		28	514	102	1235	154	566	617	386	334	604	488	218	1080		28	283	733	476	180	360	707	849	707	630	579	617	540
32	141	141	128	591	591	463	437	450	386	51	463	630		32	476	102	1235	167	707	553	321	476	566	398	193	1145		32	283	669	488	295	347	604	733	849	823	566	682	411
36	64	102	128	604	540	604	514	463	437	102	398	630		36	463	231	1170	115	656	900	283	682	566	411	257	952		36	334	553	424	360	424	784	1235	939	810	579	810	591
40	77	115	90	604	566	540	591	566	527	90	386	900		40	244	205	733	128	862	990	321	977	488	373	437	1003		40	501	579	604	360	437	836	1106	939	1055	849	875	1042
44	64	51	51	694	501	630	656	566	514	90	386	1003		44	218	128	772	205	913	1068	373	875	772	424	424	965		44	334	527	566	360	514	669	1016	1068	733	862	669	733
48	64	51	38	746	540	707	939	630	604	90	450	952		48	205	167	836	231	1055	1222	373	1042	643	386	398	939		48	244	566	579	398	450	784	875	952	1119	849	784	759
52	90	64	64	913	617	759	1068	900	630	64	398	1235		52	231	128	759	205	1364	1402	373	887	591	540	386	1106		52	193	527	437	488	617	913	913	1016	900	707	707	952
56	38	102	38	823	669	733	1196	1273	669	64	334	1454		56	205	115	823	257	1312	1338	682	1325	759	797	488	1170		56	218	488	411	476	733	977	810	926	1093	810	836	1016
60	64	51	64	797	643	823	1261	1235	707	51	591	1402		60	180	218	617	360	1055	1479	566	1351	849	527	579	1209		60	128	514	321	591	707	939	990	746	1183	836	849	1119
64	38	64	25	784	617	887	1621	1068	720	102	501	1724		64	154	90	360	334	1158	1492	501	1338	784	862	656	1261		64	193	373	257	617	784	1183	1055	682	1158	810	862	990
68	0	0	0	0	0	0	0	0	0	12	0	0		68	0	0	0	0	0	0	0	0	0	0	0	25		68	115	386	167	669	965	1402	1080	990	1093	720	1003	1042
72	25	12	0	424	257	334	308	591	244	12	128	398		72	12	12	12	218	270	476	527	707	154	244	154	347		72	141	308	180	694	1158	1286	939	1093	1286	1055	1029	900
76	12	0	0	373	141	373	270	656	128	25	90	334		76	0	0	0	360	154	411	527	617	141	321	270	527		76	90	283	180	926	1068	1389	862	1055	1132	849	1222	1145
80	0	0	0	347	218	373	244	501	193	12	115	450		80	0	25	0	424	257	476	476	514	231	283	244	411		80	38	167	128	965	1055	1428	1196	1209	1248	1055	1351	977
84	0	0	0	476	128	308	205	347	167	0	141	476		84	0	0	0	424	424	630	527	630	231	334	218	656		84	51	128	102	875	1106	1364	1132	1518	1209	977	1518	875
88	0	0	0	244	167	257	244	579	167	12	115	437		88	12	0	0	656	437	643	514	424	167	270	218	540		88	25	0	38	900	398	836	244	694	141	102	360	244
96	0	0	0	308	141	321	321	501	51	25	102	386		96	0	0	0	669	386	759	591	566	270	334	154	463		96	25	12	12	823	321	488	180	347	64	115	180	270
100	12	12	0	334	154	334	295	656	102	25	90	308		100	0	0	0	823	682	797	617	476	257	308	180	527		100	0	0	12	746	308	630	154	566	102	141	218	334
104	0	0	0	334	218	257	437	437	154	51	205	514		104	0	0	0	1016	913	797	669	1016	244	501	218	579		104	0	0	12	746	257	617	90	424	128	180	141	450
108	0	0	0	476	231	424	566	450	141	25	115	424		108	0	0	0	1222	823	862	656	682	321	463	115	591		108	0	25	25	733	321	604	64	424	141	205	154	218
112	0	0	0	334	115	334	656	630	167	0	128	308		112	0	0	0	1595	1042	913	1132	1080	295	553	167	617		112	12	12	12	694	386	450	64	514	64	102	115	334
116	0	0	0	463	270	411	1389	926	295	0	167	514		116	0	12	0	2110	1376	1338	1531	1750	579	398	180	1016		116	0	0	0	797	411	553	115	437	102	231	115	205
120	0	0	0	488	218	321	2123	887	527	25	257	488		120	0	0	0	1891	1724	1479	1827	1711	952	411	334	1325		120	12	0	0	784	463	553	102	476	180	193	167	180
124	0	0	0	501	128	476	2097	977	514	0	167	579		124	0	0	0	2097	1750	1325	2187	2432	1183	682	244	1376		124	0	12	0	977	553	656	283	463	102	244	193	257
128	0	0	0	591	154	360	2534	1364	398	25	283	720		128	0	0	0	2316	1852	1402	2715	3847	1531	707	218	1955		128	0	0	12	887	398	875	308	694	64	347	244	347
132	0	12	0	450	205	411	3152	1621	707	12	141	669		132	0	0	0	1840	2110	1338	3834	3834	2020	926	488	2393		132	0	0	0	1068	694	784	231	514	77	398	295	373
136	0	12	0	437	231	566	3036	2123	900	51	257	579		136	0	0	0	1647	1801	1312	4130	3718	3474	797	295	2779		136	0	0	0	1261	759	1080	424	836	257	321	257	205
140	0	0	0	463	347	321	167	810	540	64	51	115		140	0	0	0	1608	1364	1492	141	604	720	270	193	424		140	0	25	0	1106	694	1119	347	810	77	386	334	360
144	0	0	0	193	244	205	128	1093	707	51	218	205		144	0	0	0	926	836	1196	1016	1080	810	386	231	553		144	25	0	0	1454	579	1170	527	1080	180	437	193	476
148	0	0	0	180	193	141	231	1351	669	12	154	180		148	0	0	0	746	694	1029	887	1569	862	373	154	463		148	12	0	0	1634	810	1338	527	1106	115	682	308	334
152	0	0	0	128	77	90	360	1466	849	0	51	128		152	0	0	0	643	720	772	849	1479	1351	437	308	579		152	0	0	12	1762	887	1351	643	1364	218	463	321	398
156	0	0	0	141	64	115	643	2277	1042	38	141	102		156	0	0	0	694	566	514	1029	1968	1557	463	141	669		156	0	12	0	1672	823	1402	1222	1544	295	630	257	386
160	0	0	0	154	77	115	488	2097	1273	12	167	77		160	0	0	0	373	476	579	1531	2071	3461	591	205	759		160	0	0	0	1196	514	862	1544	990	540	218	360	115
164	0	0	0	102	102	115	887	2792	1737	25	128	167		164	0	0	25	347	295	398	2264	2264	3834	527	154	810		164	0	0	0	1441	540	669	1364	591	604	244	231	167
168	0	0	0	51	38	90	1080	3229	1878	25	51	90		168	0	0	12	244	257	373	3191	3384	5301	450	141	977		168	0	0	12	1273	424	913	1093	579	347	218	295	180
172	0	0	0	51	51	12	1145	3332	2213	12	102	51		172	0	12	0	180	283	218	3963	4027	6871	450	141	1196		172	0	12	12	1248	360	875	1119	553	617	373	141	154
176	0	0	0	25	90	25	1454	4001	2728	0	77	64		176	0	0	0	205	231	218	5391	5147	8750	283	141	1119		176	12	12	0	1364	308	887	1955	759	772	398	154	141
180	0	0	25	38	12	12	2097	4478	3487	0	38	102		180	0	0	12	154	154	154	6601	6601	10809	270	64	1338		180	25	0	12	1003	373	720	2264	810	591	488	128	231
184	0	0	0	38	25	38	2213	4426	3834	0	25	90		184	0	12	0	128	115	218	8364	7167	12340	347	51	1659		184	0	12	25	1209	411	875	2586	900	527	514	51	141
188	12	25	0	38	38	12	2715	6356	4941	0	64	51		188	0	12	0	51	51	180	9355	8981	15235	308	102	1479		188	12	25	12	1080	283	823	2728	926	772	720	64	270
192	25	0	0	38	12	77	3062	7759	5726	0	64	38		192	0	12	12	38	64	102	11838	11092	17809	398	102	1582		192	12	0	0	977	257	772	3358	1531	810	643	25	257
196	12	0	0	0	0	0	3551	8222	6948	0	64	51		196	12	12	0	51	25	102	14270	12765	20987	180	128	1904		196	12	0	0	579	244	784	4426	1659	797	643	77	321
200	0	12	0	0	0	12	3963	8029	8235	25	154	38		200	0	0	0	12	64	64	17243	15596	21798	141	64	1852		200	0	0	12	643	115	759	5571	1775	1003	913	51	308
204	51	12	0	25	0	0	5069	8068	9470	25	283	0		204	12	0	0	12	38	25	19314	19096	26019	154	90	1930		204	0	25	0	707	205	694	7875	2766	990	759	102	283
208	0	12	0	0	12	0	5069	8866	10204	0	360	51		208	12	12	0	0	64	51	19855	20498	26791	167	12	2084		208	12	0	12	411	205	669	8209	2933	952	926	141	450
212	12	12	12	12	12	0	5636	9522	12095	12	501	51		212	0	25	25	12	25	12	20678	22763	28361	205	51	2200		212	12	0	12	360	90	566	9959	3989	1428	965	102	476
216	0	0	0	12	0	0	6575	9522	13189	12	386	12		216	12	0	12	0	12	12	21000	24462	30458	64	25	2226		216	12	25	12	205	141	476	11195	5481	1479	977	205	669
Donor A CD8														Donor B CD8														Donor C CD8
Hours	Mock			CAR Alone			S1-61_PD1(A99L):MyD88			S1-61_TurboGFP				Hours	Mock			CAR Alone			S1-61_PD1(A99L):MyD88			S1-61_TurboGFP				Hours	Mock			CAR Alone			S1-61_PD1(A99L):MyD88			S1-61_TurboGFP
20	965	887	797	2599	2702	3487	1312	1055	1170	1930	2239	1325		20	797	875	965	746	1364	1428	1145	1441	2599	2341	1917	3178		20	2200	1299	1389	1145	1080	1930	2071	1209	1737	1582	1299	2200
24	746	772	566	2033	2148	2419	1119	836	836	1557	1672	926		24	514	694	952	514	1029	1093	952	1183	1981	1865	1415	2560		24	1634	1029	1106	913	823	1557	2303	1170	1827	1351	875	1814
28	849	579	424	1724	1814	2290	1029	926	579	1531	1492	965		28	527	450	772	540	965	939	926	1055	1801	1750	1209	2226		28	1299	952	977	977	733	1402	2033	1042	1827	1389	939	2071
32	617	463	321	1814	1994	2097	926	720	682	1492	1325	849		32	514	450	540	463	1158	887	990	1029	1608	1647	1093	2367		32	1222	887	887	939	836	1325	2316	977	1737	1222	1106	2161
36	604	411	295	1672	1968	1917	720	772	875	1518	1158	849		36	501	411	566	553	913	836	784	977	1685	1827	1209	2676		36	1389	772	1209	965	875	1569	2303	1016	2226	1466	1158	2470
40	579	334	283	1685	1762	1814	604	643	669	1364	1106	746		40	553	476	669	514	939	913	720	965	1647	1762	1170	2599		40	1248	1016	1093	1003	797	1724	2432	746	2303	1698	1029	2457
44	424	334	205	1454	1775	1544	591	617	733	1196	1093	682		44	450	488	643	579	977	926	694	784	1737	1569	810	1878		44	913	759	682	849	682	1261	1994	682	2329	1338	875	1891
48	411	347	218	1261	1582	1351	476	862	656	1170	1132	694		48	295	373	450	540	836	900	707	849	1505	1273	810	1891		48	643	643	694	797	643	1170	1840	514	2483	1299	720	1827
52	373	270	205	1235	1878	1325	527	797	527	1158	965	707		52	295	244	295	527	900	875	746	733	1273	1286	643	2020		52	360	501	643	682	604	1196	1930	514	2239	1080	836	1595
56	373	244	193	1029	1698	1389	424	617	656	900	862	797		56	244	334	295	540	862	887	926	862	1402	1170	553	1788		56	411	398	591	604	630	1158	1930	424	2251	1068	797	1750
60	347	231	141	1042	1621	1376	334	656	682	1016	836	694		60	231	257	257	566	707	939	759	784	1312	1170	437	1685		60	540	488	424	682	733	1183	2058	463	2251	1132	784	1711
64	218	205	167	1106	1698	1518	463	694	527	1029	1029	643		64	167	167	218	488	823	862	810	784	1273	1183	566	1569		64	398	386	476	707	784	990	1814	463	2367	887	784	1775
68	0	0	0	0	0	0	0	0	0	154	115	90		68	0	0	0	0	0	0	167	205	0	1183	476	1659		68	193	283	476	694	656	875	1943	437	2290	1068	682	1544
72	25	25	12	64	270	205	128	51	733	141	64	51		72	64	0	38	411	128	270	90	218	360	1196	463	1557		72	180	193	411	836	501	1080	2341	373	2573	875	669	1711
76	25	38	12	77	180	180	51	64	810	141	51	25		76	90	38	38	295	115	218	141	167	244	1106	373	1659		76	257	205	386	733	488	1106	1814	450	2290	977	630	1634
80	77	38	0	64	102	257	102	77	862	102	12	38		80	25	12	0	347	51	141	77	167	295	1106	411	1544		80	244	154	334	694	604	862	1698	437	2354	1119	707	1659
84	25	12	12	38	180	308	102	64	823	180	38	51		84	0	25	12	295	90	167	128	167	193	965	398	1595		84	115	115	283	694	501	1003	2303	411	2547	1170	694	1441
88	12	0	0	38	128	244	90	51	926	167	38	64		88	25	25	0	218	115	128	180	270	231	887	373	1235		88	141	12	141	411	115	514	1351	733	2303	746	746	939
96	12	0	0	51	141	373	141	90	823	141	25	25		96	12	12	0	128	64	115	231	308	295	527	283	900		96	102	38	77	295	64	244	1119	283	2084	553	656	862
100	0	12	0	64	141	295	141	128	1093	77	38	64		100	12	0	0	141	90	115	257	360	231	295	141	810		100	38	51	25	270	90	334	1068	308	1943	514	334	875
104	0	0	0	77	193	308	205	154	1364	51	38	25		104	12	0	0	90	77	77	244	373	295	308	102	656		104	51	25	12	231	38	411	1132	205	2097	476	450	772
108	0	0	0	51	193	373	115	64	1544	90	128	38		108	0	0	0	115	12	77	295	334	437	205	102	566		108	90	12	0	283	25	347	1248	270	2264	514	450	913
112	0	0	0	25	218	463	180	205	1788	51	128	38		112	0	0	0	38	51	38	321	398	437	141	77	398		112	12	12	25	205	38	257	1248	205	2483	553	360	759
116	12	0	0	128	308	347	167	360	2818	64	77	77		116	0	0	0	115	77	102	334	540	501	77	64	308		116	12	0	25	218	102	295	1286	270	2483	630	308	772
120	0	0	0	90	386	411	154	476	2985	38	64	38		120	0	0	0	38	64	90	437	656	604	51	38	257		120	12	12	12	321	154	295	1750	308	2406	591	334	759
124	12	0	0	167	398	308	115	373	3139	90	38	77		124	0	0	0	0	12	102	772	682	669	77	25	360		124	0	0	0	308	128	308	1659	295	2663	579	424	900
128	0	0	0	141	308	373	141	437	3139	51	77	90		128	12	0	0	77	12	51	1003	566	823	77	38	102		128	12	0	51	334	115	283	1196	360	2650	553	373	1055
132	0	0	0	180	295	488	308	450	3152	51	77	77		132	0	0	12	25	0	38	849	746	823	64	64	115		132	25	0	51	373	193	360	1582	463	2766	540	579	810
136	0	0	12	154	373	476	270	488	3757	77	25	90		136	12	12	0	12	12	0	1068	720	772	77	25	12		136	0	12	0	437	205	630	1621	386	2856	772	643	1080
140	0	0	12	102	128	257	77	270	1659	38	0	38		140	0	0	0	12	0	12	411	0	450	77	51	25		140	38	25	0	463	205	463	1827	488	3049	720	617	900
144	0	25	25	128	102	180	141	295	913	12	12	12		144	0	0	0	0	0	25	733	231	630	25	0	25		144	12	25	0	488	257	540	2071	579	3062	862	694	900
148	0	0	0	205	115	64	180	411	1003	12	51	12		148	0	0	0	0	0	12	746	295	566	25	12	25		148	0	25	0	373	321	514	2046	579	3088	759	784	1068
152	12	12	0	64	115	51	128	450	887	0	25	38		152	12	0	0	0	0	12	887	295	579	12	0	0		152	0	25	0	321	295	682	2071	488	2715	694	862	1119
156	0	0	0	64	90	115	77	424	887	12	12	38		156	0	0	12	12	0	12	1055	321	823	25	0	12		156	12	51	0	540	218	733	2213	643	2972	810	746	1183
160	0	12	0	38	64	77	154	527	952	0	0	12		160	12	12	12	12	0	0	1222	373	733	25	0	12		160	0	0	0	308	141	488	1170	476	2071	836	450	926
164	0	12	12	12	12	102	193	553	1158	12	64	0		164	0	12	25	0	0	0	1454	244	759	0	0	0		164	0	25	0	295	115	154	1634	360	2239	669	450	900
168	12	0	0	12	77	64	270	411	1608	12	38	25		168	0	12	38	12	0	0	1351	283	836	12	0	12		168	0	0	0	283	128	205	1968	437	2020	823	579	875
172	0	0	12	38	64	64	231	386	1222	0	0	12		172	0	12	0	0	0	0	1454	270	862	25	0	0		172	25	12	12	347	90	244	1840	283	2084	746	411	733
176	12	12	12	12	25	25	218	450	1750	0	12	0		176	12	0	0	0	0	0	1518	244	540	38	0	12		176	0	12	12	347	141	360	1917	463	1930	643	476	900
180	0	0	25	12	38	38	218	733	1981	0	0	25		180	12	0	12	0	0	0	1492	205	977	0	12	0		180	25	25	0	411	167	244	1827	540	1994	656	463	707
184	12	0	0	12	64	12	437	823	2097	0	12	0		184	25	12	0	12	0	0	1698	501	849	12	12	0		184	12	12	12	373	141	321	2007	566	1994	643	527	849
188	0	0	12	12	25	12	231	772	2663	0	0	0		188	0	0	12	0	12	0	1672	347	810	0	12	0		188	12	0	51	360	154	321	2110	669	2432	669	501	784
192	12	12	0	25	25	25	154	579	2702	12	12	0		192	0	12	25	0	0	0	1891	463	875	0	0	0		192	25	0	25	373	102	257	2534	501	2406	746	579	990
196	0	25	12	12	64	25	231	720	2599	0	0	12		196	0	12	12	12	25	0	2071	450	913	0	25	0		196	12	0	0	424	102	360	2406	784	2637	694	540	900
200	0	0	25	25	25	25	334	990	2522	0	12	25		200	0	12	0	0	0	0	2251	540	1068	0	12	0		200	25	12	51	334	180	218	2715	1093	2496	643	604	952
204	0	0	0	12	25	25	488	1106	2573	12	0	0		204	0	0	25	0	12	0	2380	707	1055	0	0	0		204	38	12	0	218	128	308	2277	1029	2625	579	617	1016
208	0	12	0	38	0	12	707	1235	2805	0	0	0		208	25	0	25	0	0	0	2380	579	1158	0	0	0		208	0	0	12	231	167	360	2432	862	2908	579	656	875
212	25	25	12	38	12	12	1068	1273	3204	0	0	12		212	51	25	12	12	0	0	2509	682	1338	0	0	0		212	12	0	12	386	193	308	2753	1093	3036	746	656	939
216	12	0	0	25	0	12	887	1312	3680	12	0	0		216	12	25	12	12	12	0	2663	823	1428	0	0	0		216	25	25	12	270	218	205	2921	1158	3538	566	591	862
