# Supplementary material for: Context-specific synthetic T cell promoters from assembled transcriptional elements
Source: Research Square preprint supplement (doi:10.21203/rs.3.rs-3339290/v1), 2023-10-17
Supplement: Supplementary file 2 [file 3251b3e2e8e5ba361ffd5cfa.xlsx]

## Sheet: Figure 3e
Figure 3e
Table Analyzed	BLI_post tumor injec - grouped						Day	Discovery?	P value	Mean of PBS	Mean of Raji Parental Irradiated	Difference	SE of difference	t ratio	df	q value
							-1	No	0.405445	4302500	3498000	804500	908869	0.8852	7	0.346022
Column A	PBS						1	Yes	0.000599	4342500	37940000	-33597500	5693185	5.901	7	0.003772
vs.	vs.						2	Yes	0.00011	4232500	46860000	-42627500	5487656	7.768	7	0.001385
Column B	Raji Parental Irradiated						3	Yes	0.003269	4950000	35180000	-30230000	6915706	4.371	7	0.013731
							6	No	0.080011	4550000	7896000	-3346000	1635449	2.046	7	0.100813
Test details							10	No	0.788656	4000000	3796000	204000	732425	0.2785	7	0.621067
Test name	Unpaired t test						11	Yes	0.008762	4835000	26360000	-21525000	5982347	3.598	7	0.018401
Variance assumption	Individual variance for each row						12	Yes	0.007176	3415000	18236000	-14821000	3953163	3.749	7	0.018401
Multiple comparisons	False Discovery Rate (FDR)						13	Yes	0.008373	3692500	12218000	-8525500	2347156	3.632	7	0.018401
Method	Two-stage step-up (Benjamini, Krieger, and Yekutieli)						18	No	0.205019	3635000	4310000	-675000	483077	1.397	7	0.21527
Desired FDR (Q)	0.01						20	No	0.95967	3052500	3086000	-33500	639248	0.05241	7	0.671769
							24	No	0.411931	2862500	2536000	326500	374270	0.8724	7	0.346022
Number of tests performed	18						25	No	0.041762	2740000	12286000	-9546000	3837926	2.487	7	0.065776
Number of rows omitted	0						26	No	0.056483	2872500	17284000	-14411500	6315753	2.282	7	0.079077
							27	Yes	0.02713	2270000	17182000	-14912000	5355756	2.784	7	0.048834
							31	No	0.106422	2187500	6556000	-4368500	2358542	1.852	7	0.121902
							34	No	0.903691	2302500	2236000	66500	530075	0.1255	7	0.669795
							38	No	0.262404	2662500	2072000	590500	484503	1.219	7	0.25433

## Sheet: Figure 5g
Fig 5g
Log-rank (Mantel-Cox) test (recommended)
Chi square	45.26
df	2
P value	1.4856e-10
P value summary	****
Are the survival curves sig different?	Yes

## Sheet: Extended Data Fig 5b
Extended Data Fig. 5b
Test details							Day	Discovery?	P value	Mean of Log(turboGFP (41bbz))	Mean of Log(turboGFP (TgX))	Geometric mean of ratios	SEM of log(ratios)	t ratio	df	q value
Test name	Ratio paired t test						0			0	0	0	0
Variance assumption	Individual variance for each group						1	Yes	0.001078	0.1119	1.132	0.0955	0.08096	12.6	3	0.002264
Multiple comparisons	False Discovery Rate (FDR)						3	Yes	0.004017	-0.0609	0.5711	0.2334	0.0786	8.041	3	0.005624
Method	Two-stage step-up (Benjamini, Krieger, and Yekutieli)						5	Yes	0.000851	-0.1558	0.4483	0.2488	0.04427	13.65	3	0.002264
Desired FDR (Q)	0.05						8	Yes	0.020147	-0.1304	0.3214	0.3534	0.09976	4.528	3	0.021155
Number of tests performed	4

## Sheet: Extended Data Fig 7d,e
Extended Data Fig. 7d
CD4 - Cytotoxicity
Dunnett's multiple comparisons test	Mean Diff.	95.00% CI of diff.	Below threshold?	Summary	Adjusted P Value
19CAR vs. Mock	-0.2503	-0.7203 to 0.2196	No	ns	0.3472
19CAR vs. iTurboGFP+19CAR	0.3757	-0.09429 to 0.8456	No	ns	0.1178
19CAR vs. iPD1:MyD88+19CAR	0.988	0.5180 to 1.458	Yes	***	0.0008
CD8 - Cytotoxicity
Dunnett's multiple comparisons test	Mean Diff.	95.00% CI of diff.	Below threshold?	Summary	Adjusted P Value
19CAR vs. Mock	-0.003	-0.9159 to 0.9099	No	ns	>0.9999
19CAR vs. iTurboGFP+19CAR	0.1523	-0.7606 to 1.065	No	ns	0.9303
19CAR vs. iPD1:MyD88+19CAR	0.8839	-0.02908 to 1.797	No	ns	0.0573
Extended Data Fig. 7e
CD4 - Proliferation
Dunnett's multiple comparisons test	Mean Diff.	95.00% CI of diff.	Below threshold?	Summary	Adjusted P Value
19CAR vs. Unmodified	0.9149	-125.1 to 127.0	No	ns	>0.9999
19CAR vs. iTurboGFP+19CAR	-4.333	-130.4 to 121.7	No	ns	0.9993
19CAR vs. iPD1:MyD88+19CAR	-142.8	-268.8 to -16.72	Yes	*	0.0285
CD8 - Proliferation
Dunnett's multiple comparisons test	Mean Diff.	95.00% CI of diff.	Below threshold?	Summary	Adjusted P Value
19CAR vs. Unmodified	0.8369	-7.755 to 9.429	No	ns	0.984
19CAR vs. iTurboGFP+19CAR	-1.694	-10.29 to 6.899	No	ns	0.8939
19CAR vs. iPD1:MyD88+19CAR	-23.42	-32.01 to -14.82	Yes	***	0.0002

## Sheet: Extended Data Figure 8e
Kaplan Meier survival curve with statistics comparing Marker-Only and LASI-7/21 groups (Mantel-Cox test: P < 0.05 *).
Comparison of Survival Curves
Log-rank (Mantel-Cox) test
Chi square	4.874
df	1
P value	0.0273
P value summary	*
Are the survival curves sig different?	Yes
