# Supplementary material for: Context-specific synthetic T cell promoters from assembled transcriptional elements
Source: Research Square preprint supplement (doi:10.21203/rs.3.rs-3339290/v1), 2023-10-17
Supplement: Supplementary file 3 [file 37dc3875eceb53190b51d16a.xlsx]

## Sheet: Sheet1
Library	Total Reads	Selected Reads	Fraction	Total Contigs	Selected Contigs
Plasmid	7999639	7909084	0.98868	37811	1268
Virus	6920589	6824567	0.98613	35705	1304
24h	2949067	2931588	0.99407	13086	1372
48h	2689221	2669417	0.99264	15212	1649
72h	4312543	4295860	0.99613	7583	752
Restim	1826179	1821225	0.99729	3720	667
