# Supplementary material for: Context-specific synthetic T cell promoters from assembled transcriptional elements
Source: Research Square preprint supplement (doi:10.21203/rs.3.rs-3339290/v1), 2023-10-17
Supplement: Supplementary file 4 [file 5458a248559b94a8d131724c.xlsx]

## Sheet: Sheet 1 - candidate_iSynPros
Candidate iSynPros
iSynPro #	TRE Sequence	24 hrs	48 hrs	72 hrs	Restim
1	FCRKFMO*QUJJOTOOK	2.55664	1.91567	0.00808982	0.717963
2	NVEHKPTRFPOVDLP	1.30074	1.54302	0.0338782	0.165473
3	PPVJHPLOUVMK	0.516632	1.92036	0.0446879	4.23077
4	KVOINEORJOOJV	1.27626	1.22957	1.50714	0.113255
5	EPAEAOUOPL	1.0675	0.977022	7.04903	0.120089
6	AEPONIPQVFVE	1.33434	1.34614	0.102208	0.626812
7	EBUFJEPVPLDJ	1.95234	1.71491	2.89056	0.35711
8	NKOMFVSOLTPNSIVNDU	2.89246	5.03642	0.044378	0.749448
	ORACFPKEU	1.9293	0.802647	0.141475	2.2346
	UVJLDPUTSKRLOQMU	1.58626	1.5791	1.25143	9.31073
	CNOVJAJMEONO	2.91852	1.90107	0.0326239	4.81598
	CLVNVOPOKA	1.28993	0.710761	3.11696	0.0717894
	OEVUQKUJONNKUFLVDA	1.45016	1.3259	0.0494714	7.75444
	OPVAKEMOOBKOVIM	0.550497	2.18458	0.0123621	5.46378
	JPMQLPMORGP	1.03876	1.41376	1.2986	4.60091
	ULROMPBC	1.23744	0.862041	0.013432	1.82938
	KENPMJPOOFCBG	8.02544	2.6871	2.59605	0.12792
	FCAOMOPP	1.30185	1.31541	1.08625	1.08733
	LOICOPPNFMMUPP	0.593109	1.02176	0.00151816	4.9629
	VASRULBMHBGFFFARPPUACCL	2.48165	3.42435	1.29211	0.032932
	FNMAEQPPPPLDAG	3.9155	2.84411	0.0942553	0.257251
	UROOPCPTPFAPOPRT	0.990628	1.4078	4.03639	0.469556
	RCLOJMSHAON	3.56894	1.97438	5.03227e-05	0.133181
	ULUOOJENSFFMKAA	3.07642	5.03091	5.46096e-06	5.46096e-06
	LEGEND (fold change from baseline)	1.25-1.5	1.5 - 2.0	2.0 - 5.0	Above 5.0
