# Supplementary material for: Context-specific synthetic T cell promoters from assembled transcriptional elements
Source: Research Square preprint supplement (doi:10.21203/rs.3.rs-3339290/v1), 2023-10-17
Supplement: Supplementary file 5 [file d5ae6c097c9f450676c995ae.xlsx]

## Sheet: Sheet1
	Raw	Plasmid	Virus	Cell
Paired reads sequenced	12293088	9230952	7992735	13065645
alignMerge Classification
Readthrough contigs	10886973	7446454	6709955	11165418
Template=300 contigs	43247	937	915	390
Overlap contigs	909745	1297724	910879	614296
ALIGN-MERGED CONTIGS	11839965	8745115	7621749	11780104
No merge contigs	132571	267698	231922	678008
Indeterminate contigs	320552	218139	139064	607533
DISCARDED CONTIGS	453123	485837	370986	1285541
% Align-Merged contig	96.31	94.74	95.36	90.16
TREsCaller Mappings
Perfect match TREs	81015047	86774480	67139670	122158780
One mismatch TREs	2878721	1146515	692340	2034138
Pairwise aligned TREs	3066482	319642	192683	528226
Unmapped regions	161059	300170	162627	242242
CONTIGS MAPPED WITH TREs	11048403	7999639	6920589	11777010
PhiX174 contigs	346231	330210	311256	1145
No TREs contigs	445331	415266	389904	1949
DISCARDED CONTIGS	791562	745476	701160	3094
% contigs with mapped TREs	93.31	91.48	90.8	99.97
Discarded contigs
